# Supplementary material for: Isomerical and structural determination of N-hydroxyurea: a matrix isolation and theoretical study
Source: Royal Society of Chemistry journal article supplement (doi:10.1039/c0cp00709a), 2010-01-01
Supplement: c0cp00709a.pdf [file c0cp00709a.pdf]

## Supplementary information: additional computational details

**Table S1** Equilibrium structures<sup>a</sup> of the keto isomers of *N*-hydroxyurea at the MP2/6-311++G(2d,2p) level of theory

| Property                                                        | 1Ea     | 1Eb     | 1Za     | 1Zb     |
|-----------------------------------------------------------------|---------|---------|---------|---------|
| r(C=O <sub>1</sub> )                                            | 1.2188  | 1.2191  | 1.2224  | 1.2111  |
| r(C-N <sub>1</sub> )                                            | 1.3648  | 1.3726  | 1.3755  | 1.3870  |
| r(C-N <sub>2</sub> )                                            | 1.4121  | 1.3983  | 1.3990  | 1.4118  |
| r(N-O <sub>2</sub> )                                            | 1.4275  | 1.4122  | 1.4176  | 1.4138  |
| r(N <sub>1</sub> -H <sub>1</sub> )                              | 1.0032  | 1.0041  | 1.0051  | 1.0055  |
| r(N <sub>1</sub> -H <sub>2</sub> )                              | 1.0036  | 1.0047  | 1.0051  | 1.0057  |
| r(N <sub>2</sub> -H <sub>3</sub> )                              | 1.0104  | 1.0090  | 1.0107  | 1.0094  |
| r(O <sub>2</sub> -H <sub>4</sub> )                              | 0.9614  | 0.9660  | 0.9748  | 0.9607  |
| r(H <sub>4</sub> ...O <sub>1</sub> )                            | -       | -       | 1.9499  | 2.9556  |
| r(H <sub>3</sub> ...O <sub>1</sub> )                            | 2.4388  | 2.4607  | -       | -       |
| r(H <sub>2</sub> ...O <sub>2</sub> )                            | 2.1967  | 2.3231  | -       | -       |
| φ(O <sub>1</sub> =C-N <sub>1</sub> )                            | 125.55  | 125.15  | 124.96  | 124.62  |
| φ(O <sub>1</sub> =C-N <sub>2</sub> )                            | 119.56  | 120.62  | 121.73  | 124.04  |
| φ(C-N <sub>2</sub> -O <sub>2</sub> )                            | 113.94  | 117.44  | 111.76  | 112.98  |
| φ(N <sub>1</sub> -C-N <sub>2</sub> )                            | 114.66  | 114.22  | 113.30  | 111.31  |
| φ(H <sub>1</sub> -N <sub>1</sub> -C)                            | 114.60  | 113.85  | 113.45  | 112.55  |
| φ(H <sub>2</sub> -N <sub>1</sub> -C)                            | 117.56  | 117.36  | 116.62  | 116.85  |
| φ(C-N <sub>2</sub> -H <sub>3</sub> )                            | 109.40  | 112.86  | 112.42  | 112.91  |
| φ(H <sub>3</sub> -N <sub>2</sub> -O <sub>2</sub> )              | 108.36  | 112.43  | 107.57  | 106.30  |
| φ(N <sub>2</sub> -O <sub>2</sub> -H <sub>4</sub> )              | 102.63  | 106.26  | 101.94  | 103.34  |
| φ(H <sub>1</sub> -N <sub>1</sub> -H <sub>2</sub> )              | 118.05  | 116.92  | 114.79  | 113.84  |
| φ(C=O <sub>1</sub> ...H <sub>3</sub> )                          | 54.29   | 54.64   | -       | -       |
| φ(C=O <sub>1</sub> ...H <sub>4</sub> )                          | -       | -       | 82.71   | 69.58   |
| φ(N <sub>1</sub> -H <sub>2</sub> ...O <sub>1</sub> )            | 103.86  | 97.32   | -       | -       |
| φ(O-H <sub>4</sub> ...O <sub>1</sub> )                          | -       | -       | 120.74  | 64.89   |
| θ(O <sub>1</sub> CN <sub>2</sub> H <sub>3</sub> )               | 37.51   | -27.88  | -129.15 | -142.09 |
| θ(O <sub>1</sub> CN <sub>2</sub> O <sub>2</sub> )               | 158.9   | -161.16 | -8.07   | -21.41  |
| θ(N <sub>1</sub> CN <sub>2</sub> O <sub>2</sub> )               | -26.26  | 19.32   | 171.71  | 160.07  |
| θ(CN <sub>2</sub> O <sub>2</sub> H <sub>4</sub> )               | 123.60  | 63.52   | -1.66   | 98.52   |
| θ(H <sub>3</sub> N <sub>2</sub> O <sub>2</sub> H <sub>4</sub> ) | -114.37 | -69.96  | 122.20  | -137.11 |
| θ(N <sub>1</sub> CN <sub>2</sub> H <sub>3</sub> )               | -147.71 | 152.60  | 50.62   | 39.40   |
| θ(H <sub>1</sub> N <sub>1</sub> CO <sub>1</sub> )               | -14.16  | -16.79  | -13.20  | -16.11  |
| θ(H <sub>2</sub> N <sub>1</sub> CO <sub>1</sub> )               | -159.45 | -158.62 | -149.98 | -150.60 |
| θ(H <sub>1</sub> N <sub>1</sub> CN <sub>2</sub> )               | 171.43  | 162.70  | 167.03  | 162.40  |
| θ(H <sub>2</sub> N <sub>1</sub> CN <sub>2</sub> )               | 26.14   | 20.87   | 30.25   | 27.91   |
| μ                                                               | 3.449   | 2.958   | 3.515   | 3.745   |

<sup>a</sup> see Figure 1 for atom numbering; the bond distances are given in Å, the angles in degrees, dipole moments in Debyes.

**Table S2** Relative energies ( $\Delta E$ ), relative zero-point corrected energies ( $\Delta E_{ZPE}$ ) (in  $\text{kJ mol}^{-1}$ ), dipole moments ( $\mu$  /D) and abundances at 298 K for *N*-hydroxyurea isomers calculated at the MP2/6-311++G(2d,2p) level in water solution (C-PCM calculations)

| isomer     | $\Delta E$ | $\Delta E_{ZPE}$ | $\mu$ | % <sub>298</sub> |
|------------|------------|------------------|-------|------------------|
| <b>1Ea</b> | 0.00       | 0.00             | 5.46  | 87.2             |
| <b>1Za</b> | 12.07      | 11.88            | 6.37  | 1.2              |
| <b>1Eb</b> | 5.54       | 5.52             | 5.22  | 8.6              |
| <b>1Zb</b> | 8.77       | 8.73             | 6.50  | 3.0              |

**Table S3** Selected geometric parameters calculated at the MP2/6-311++G(2d,2p) level for the keto isomers of *N*-hydroxyurea in water (C-PCM calculations)

| Parameter <sup>a</sup>                                                  | 1Ea    | 1Eb    | 1Za    | 1Zb    |
|-------------------------------------------------------------------------|--------|--------|--------|--------|
| r(C=O <sub>1</sub> )                                                    | 1.237  | 1.237  | 1.230  | 1.229  |
| r(C-N <sub>1</sub> )                                                    | 1.348  | 1.351  | 1.366  | 1.366  |
| r(C-N <sub>2</sub> )                                                    | 1.397  | 1.390  | 1.392  | 1.395  |
| r(N-O <sub>2</sub> )                                                    | 1.420  | 1.411  | 1.404  | 1.411  |
| r(N <sub>2</sub> -H <sub>3</sub> )                                      | 1.024  | 1.023  | 1.024  | 1.024  |
| r(O <sub>2</sub> -H <sub>4</sub> )                                      | 0.981  | 0.985  | 0.984  | 0.979  |
| $\phi$ (C-N <sub>2</sub> -H <sub>3</sub> )                              | 111.1  | 113.3  | 115.2  | 114.6  |
| $\phi$ (H <sub>3</sub> -N <sub>2</sub> -O <sub>2</sub> )                | 109.1  | 112.1  | 111.04 | 108.5  |
| $\phi$ (N <sub>2</sub> -O <sub>2</sub> -H <sub>4</sub> )                | 103.6  | 106.2  | 106.3  | 103.8  |
| $\theta$ (O <sub>1</sub> CN <sub>2</sub> H <sub>3</sub> )               | 37.6   | -33.2  | -146.0 | -150.8 |
| $\theta$ (O <sub>1</sub> CN <sub>2</sub> O <sub>2</sub> )               | 161.6  | -165.8 | -14.4  | -25.0  |
| $\theta$ (CN <sub>2</sub> O <sub>2</sub> H <sub>4</sub> )               | 119.8  | 72.5   | -58.6  | 108.9  |
| $\theta$ (H <sub>3</sub> N <sub>2</sub> O <sub>2</sub> H <sub>4</sub> ) | -115.1 | -60.7  | 74.9   | -122.2 |
| $\mu$                                                                   | 5.46   | 5.22   | 6.37   | 6.50   |

<sup>a</sup> see Figure 1 for atom numbering; the bond distances are given in Å, the angles in degrees, dipole moments in Debyes.

**Table S4** Definition of internal coordinates used in the normal mode analysis of the 1*Ea* and 1*Za* isomers of *N*-hydroxyurea

| 1 <i>Ea</i>             |                                                                                                                                                                                                              | 1 <i>Za</i>             |                                                                                                                                                                                                              |
|-------------------------|--------------------------------------------------------------------------------------------------------------------------------------------------------------------------------------------------------------|-------------------------|--------------------------------------------------------------------------------------------------------------------------------------------------------------------------------------------------------------|
| definition <sup>a</sup> | vibration <sup>b</sup>                                                                                                                                                                                       | definition <sup>a</sup> | vibration <sup>b</sup>                                                                                                                                                                                       |
| $\nu_1$                 | $\nu \text{ C}=\text{O}_1$                                                                                                                                                                                   | $\nu_1$                 | $\nu \text{ C}=\text{O}_1$                                                                                                                                                                                   |
| $\nu_2$                 | $\nu \text{ C}-\text{N}_1 + \nu \text{ C}-\text{N}_2$                                                                                                                                                        | $\nu_2$                 | $\nu \text{ C}-\text{N}_1 + \nu \text{ C}-\text{N}_2$                                                                                                                                                        |
| $\nu_3$                 | $\nu \text{ C}-\text{N}_1 - \nu \text{ C}-\text{N}_2$                                                                                                                                                        | $\nu_3$                 | $\nu \text{ C}-\text{N}_1 - \nu \text{ C}-\text{N}_2$                                                                                                                                                        |
| $\nu_4$                 | $\nu \text{ N}-\text{O}_2$                                                                                                                                                                                   | $\nu_4$                 | $\nu \text{ N}-\text{O}_2$                                                                                                                                                                                   |
| $\nu_5$                 | $\nu \text{ N}_2-\text{H}_3$                                                                                                                                                                                 | $\nu_5$                 | $\nu \text{ N}_2-\text{H}_3$                                                                                                                                                                                 |
| $\nu_6$                 | $\nu \text{ O}_2-\text{H}_4$                                                                                                                                                                                 | $\nu_6$                 | $\nu \text{ O}_2-\text{H}_4$                                                                                                                                                                                 |
| $\nu_7$                 | $\nu \text{ N}_1-\text{H}_1 + \nu \text{ N}_1-\text{H}_2$                                                                                                                                                    | $\nu_7$                 | $\nu \text{ N}_1-\text{H}_1 + \nu \text{ N}_1-\text{H}_2$                                                                                                                                                    |
| $\nu_8$                 | $\nu \text{ N}_1-\text{H}_1 - \nu \text{ N}_1-\text{H}_2$                                                                                                                                                    | $\nu_8$                 | $\nu \text{ N}_1-\text{H}_1 - \nu \text{ N}_1-\text{H}_2$                                                                                                                                                    |
| $\delta_1$              | $2\delta \text{ O}_1=\text{C}-\text{N}_1 - \delta \text{ O}_1=\text{C}-\text{N}_2 - \delta \text{ N}_1-\text{C}-\text{N}_2$                                                                                  | $\delta_1$              | $2\delta \text{ N}_1-\text{C}-\text{N}_2 - \delta \text{ O}_1=\text{C}-\text{N}_1 - \delta \text{ O}_1=\text{C}-\text{N}_2$                                                                                  |
| $\delta_2$              | $\delta \text{ O}_1=\text{C}-\text{N}_2 - \delta \text{ N}_1-\text{C}-\text{N}_2$                                                                                                                            | $\delta_2$              | $\delta \text{ O}_1=\text{C}-\text{N}_2 - \delta \text{ O}_1=\text{C}-\text{N}_1$                                                                                                                            |
| $\delta_3$              | $2\delta \text{ C}-\text{N}_2-\text{O}_2 - \delta \text{ C}-\text{N}_2-\text{H}_3 - \delta \text{ H}_3-\text{N}_2-\text{O}_2$                                                                                | $\delta_3$              | $2\delta \text{ C}-\text{N}_2-\text{O}_2 - \delta \text{ C}-\text{N}_2-\text{H}_3 - \delta \text{ H}_3-\text{N}_2-\text{O}_2$                                                                                |
| $\delta_4$              | $\delta \text{ C}-\text{N}_2-\text{H}_3 - \delta \text{ H}_3-\text{N}_2-\text{O}_2$                                                                                                                          | $\delta_4$              | $\delta \text{ C}-\text{N}_2-\text{H}_3 - \delta \text{ H}_3-\text{N}_2-\text{O}_2$                                                                                                                          |
| $\delta_5$              | $\delta \text{ N}_2-\text{O}_2-\text{H}_4$                                                                                                                                                                   | $\delta_5$              | $\delta \text{ N}_2-\text{O}_2-\text{H}_4$                                                                                                                                                                   |
| $\delta_6$              | $2\delta \text{ H}_1-\text{N}_1-\text{H}_2 - \delta \text{ C}-\text{N}_1-\text{H}_1 - \delta \text{ C}-\text{N}_1-\text{H}_2$                                                                                | $\delta_6$              | $2\delta \text{ H}_1-\text{N}_1-\text{H}_2 - \delta \text{ C}-\text{N}_1-\text{H}_1 - \delta \text{ C}-\text{N}_1-\text{H}_2$                                                                                |
| $\delta_7$              | $\delta \text{ C}-\text{N}_1-\text{H}_1 - \delta \text{ C}-\text{N}_1-\text{H}_2$                                                                                                                            | $\delta_7$              | $\delta \text{ C}-\text{N}_1-\text{H}_1 - \delta \text{ C}-\text{N}_1-\text{H}_2$                                                                                                                            |
| $\gamma_1$              | $\gamma \text{ N}_1-\text{C}(=\text{O}_1)-\text{N}_2$                                                                                                                                                        | $\gamma_1$              | $\gamma \text{ N}_1-\text{C}(=\text{O}_1)-\text{N}_2$                                                                                                                                                        |
| $\gamma_2$              | $\gamma \text{ C}-\text{N}_2 (-\text{H}_3)-\text{O}_2$                                                                                                                                                       | $\gamma_2$              | $\gamma \text{ C}-\text{N}_2 (-\text{H}_3)-\text{O}_2$                                                                                                                                                       |
| $\gamma_3$              | $\gamma \text{ C}-\text{N}_1 (-\text{H}_1)-\text{H}_2$                                                                                                                                                       | $\gamma_3$              | $\gamma \text{ C}-\text{N}_1 (-\text{H}_1)-\text{H}_2$                                                                                                                                                       |
| $\tau_1$                | $\tau \text{ C}-\text{N}_2-\text{O}_2-\text{H}_4 + \tau \text{ H}_3-\text{N}_2-\text{O}_2-\text{H}_4$                                                                                                        | $\tau_1$                | $\tau \text{ C}-\text{N}_2-\text{O}_2-\text{H}_4 + \tau \text{ H}_3-\text{N}_2-\text{O}_2-\text{H}_4$                                                                                                        |
| $\tau_2$                | $\tau \text{ O}_1=\text{C}-\text{N}_2-\text{O}_2 + \tau \text{ N}_1-\text{C}-\text{N}_2-\text{O}_2 +$<br>$\tau \text{ O}_1=\text{C}-\text{N}_2-\text{H}_3 + \tau \text{ N}_1-\text{C}-\text{N}_2-\text{H}_3$ | $\tau_2$                | $\tau \text{ O}_1=\text{C}-\text{N}_2-\text{O}_2 + \tau \text{ N}_1-\text{C}-\text{N}_2-\text{O}_2 +$<br>$\tau \text{ O}_1=\text{C}-\text{N}_2-\text{H}_3 + \tau \text{ N}_1-\text{C}-\text{N}_2-\text{H}_3$ |
| $\tau_3$                | $\tau \text{ O}_1=\text{C}-\text{N}_1-\text{H}_1 + \tau \text{ N}_1-\text{C}-\text{N}_2-\text{H}_1 +$<br>$\tau \text{ O}_1=\text{C}-\text{N}_1-\text{H}_2 + \tau \text{ N}_1-\text{C}-\text{N}_2-\text{H}_2$ | $\tau_3$                | $\tau \text{ O}_1=\text{C}-\text{N}_1-\text{H}_1 + \tau \text{ N}_1-\text{C}-\text{N}_2-\text{H}_1 +$<br>$\tau \text{ O}_1=\text{C}-\text{N}_1-\text{H}_2 + \tau \text{ N}_1-\text{C}-\text{N}_2-\text{H}_2$ |

<sup>a</sup> $\nu$ ,  $\delta$ ,  $\gamma$ , and  $\tau$  denote stretching, in-plane bending, out-of-plane bending, and torsion vibrations, respectively. <sup>b</sup>see Figure 1 for atom numbering.

**Table S5** Potential energy distribution calculated for the 1Ea isomer of *N*-hydroxyurea and its deuterated analogue

| 1Ea - NH <sub>2</sub> CONHOH |                            | ND <sub>2</sub> CONDOD |                            | PED <sup>c,d</sup> (%)                                                                                                        |
|------------------------------|----------------------------|------------------------|----------------------------|-------------------------------------------------------------------------------------------------------------------------------|
| calc                         | exp                        | calc                   | exp                        |                                                                                                                               |
| 3841 (75) <sup>a</sup>       | 3590.4 (0.10) <sup>b</sup> | 2799 (37) <sup>a</sup> | 2669.3 (0.06) <sup>b</sup> | vOH (100)<br>{vOD (100)}                                                                                                      |
| 3762 (82)                    | 3556.7 (0.13)              | 2785 (50)              | 2655.7 (0.15)              | v <sub>as</sub> NH <sub>2</sub> (99)<br>{v <sub>as</sub> ND <sub>2</sub> (99)}                                                |
| 3629 (46)                    | 3440.5 (0.06)              | 2620 (44)              | 2506.5 (0.07)              | v <sub>s</sub> NH <sub>2</sub> (99)<br>{v <sub>s</sub> ND <sub>2</sub> (98)}                                                  |
| 3600 (39)                    | 3383.5 (0.05)              | 2636 (22)              | 2581.5 (0.02)              | vNH (100)<br>{vND (99)}                                                                                                       |
| 1788 (420)                   | 1744.0 (1.00)              | 1773 (417)             | 1733.0 (1.00)              | vC=O (67), v <sub>s</sub> NCN (12)<br>{vC=O (73), v <sub>s</sub> NCN (11)}                                                    |
| 1614 (121)                   | 1567.0 (0.17)              | 1208 (8)               |                            | δNH <sub>2</sub> (83)<br>{δND <sub>2</sub> (49), v <sub>s</sub> NCN (20), δND (11), vNO (10)}                                 |
| 1447 (49)                    | 1405.0 (0.13)              | 1116 (3)               |                            | δNH (51), δOH (20)<br>{δND (40), δND <sub>2</sub> (23), vNO (18)}                                                             |
| 1428 (132)                   | 1384.0 (0.12)              | 1422 (301)             | 1379.5 (0.26)              | v <sub>as</sub> NCN (40), δNH (32)<br>{v <sub>as</sub> NCN (68), δOCN (13)}                                                   |
| 1384 (56)                    | 1347.3 (0.05)              | 1042 (12)              | 1008.8 (0.04)              | δOH (67)<br>{δOD (60), δND (28)}                                                                                              |
| 1129 (7)                     | 1063.0 (0.003)             | 932 (4)                |                            | ρNH <sub>2</sub> (56)<br>{ρND <sub>2</sub> (48), v <sub>s</sub> NCN (14), vNO (10)}                                           |
| 1058 (32)                    | 1025.7 (0.06)              | 978 (58)               | 957.6 (0.09)               | vNO (61), δOH (10)<br>{vNO (41), δOD (35)}                                                                                    |
| 976 (41)                     | 949.1 (0.03)               | 867 (8)                | 846.7 (0.01)               | v <sub>s</sub> NCN (52), δCNO (20), γNH (18)<br>{v <sub>s</sub> NCN (38), δCNO (16), γNCN (14), γND (10)}                     |
| 795 (76)                     | 763.4 (0.08)               | 774 (39)               | 739.3 (0.06)               | γNCN (48), γNH (17), v <sub>s</sub> NCN (14)<br>{γNCN (62), γND (11), v <sub>s</sub> NCN (10)}                                |
| 684 (161)                    | 636.6 (0.24)               | 576 (74)               |                            | γNH (30), δCNO (14), v <sub>s</sub> NCN (13), γNCN (12), vNO (10)<br>{γND (30), δCNO (25), v <sub>s</sub> NCN (18), vNO (11)} |
| 595 (46)                     | 604.9 (0.13)               | 408 (14)               |                            | τNH <sub>2</sub> (32), δNCN (23), γOH (18)<br>{τND <sub>2</sub> (75)}                                                         |
| 543 (18)                     | 554.9 (0.07)               | 489 (0)                |                            | δOCN (45), τNH <sub>2</sub> (21), δNCN (16)<br>{δOCN (55), ρND <sub>2</sub> (23)}                                             |
| 529 (14)                     | 525.8 (0.03)               | 518 (66)               |                            | δNCN (56), δOCN (26)<br>{δNCN (40), γND (32)}                                                                                 |
| 488 (254)                    |                            | 370 (146)              |                            | ωNH <sub>2</sub> (72), v <sub>as</sub> NCN (11)<br>{ωND <sub>2</sub> (82)}                                                    |
| 383 (16)                     |                            | 284 (10)               |                            | γOH (44), ωNH <sub>2</sub> (20)<br>{γOD (50), ωND <sub>2</sub> (16), τND <sub>2</sub> (10)}                                   |
| 320 (9)                      |                            | 300 (7)                |                            | δCNO (41), δNCN (27), γNH (14)<br>{δCNO (32), δNCN (28), γND (13)}                                                            |
| 184 (2)                      |                            | 171 (2)                |                            | γOCNO (80)<br>{γOCNO (81)}                                                                                                    |

<sup>a</sup> The MP2/6-311++G(2d,2p) calculated harmonic frequencies (in cm<sup>-1</sup>) and intensities (in km mol<sup>-1</sup>) are given. <sup>b</sup> For the observed bands the relative integrated intensities are given in parentheses. <sup>c</sup> All values less than 10% have been omitted. Definition of internal coordinates is given in Table S2 (ESI<sup>†</sup>). <sup>d</sup> The assignment obtained for the ND<sub>2</sub>CONDOD molecule is given in braces.

**Table S6** Potential energy distribution calculated for the 1Za isomer of *N*-hydroxyurea

| 1Za - NH <sub>2</sub> CONHOH |                            | PED <sup>c</sup> (%)                                    |
|------------------------------|----------------------------|---------------------------------------------------------|
| calculated                   | experimntl                 |                                                         |
| 3625 (99) <sup>a</sup>       | 3398.0 (0.44) <sup>b</sup> | vOH (97)                                                |
| 3736 (59)                    | 3535.0 (0.28)              | v <sub>as</sub> NH <sub>2</sub> (100)                   |
| 3616 (52)                    | 3430.1 (0.18)              | v <sub>s</sub> NH <sub>2</sub> (99)                     |
| 3587 (26)                    | 3372.5 (0.22)              | vNH (97)                                                |
| 1777 (286)                   | 1725.4 (0.74)              | vC=O (68), v <sub>s</sub> NCN (12)                      |
| 1636 (85)                    |                            | δNH <sub>2</sub> (88)                                   |
| 1533 (28)                    |                            | δNH (48), δOH (22), v <sub>as</sub> NCN (10)            |
| 1354 (48)                    | 1323.5 (0.31)              | v <sub>as</sub> NCN (48), δNH (25)                      |
| 1435 (302)                   | 1394.0 (1.00)              | δOH (39), v <sub>as</sub> NCN (28), δNH (19)            |
| 1134 (6)                     |                            | ρNH <sub>2</sub> (48), vNO (25)                         |
| 1089 (25)                    |                            | vNO (51), v <sub>s</sub> NCN (27)                       |
| 997 (39)                     | 954.5 (0.33)               | v <sub>s</sub> NCN (38), δCNO (25), γNH (22)            |
| 785 (81)                     | 692.9 (0.15)               | γNCN (43), γNH (23), v <sub>s</sub> NCN (20)            |
| 643 (120)                    | 535.2 (0.39)               | γNH (38), ωNH <sub>2</sub> (23), δNCN (11)              |
| 418 (30)                     |                            | τNH <sub>2</sub> (56), γOH (25)                         |
| 705 (86)                     | 680.5 (0.58)               | δOCN (24), v <sub>s</sub> NCN (20), δNCN (19), γNH (15) |
| 472 (40)                     |                            | δNCN (43), δOCN (19), ρNH <sub>2</sub> (11)             |
| 522 (175)                    |                            | ωNH <sub>2</sub> (36), γNH (24)                         |
| 429 (110)                    |                            | γOH (61), τNH <sub>2</sub> (22)                         |
| 313 (32)                     |                            | δCNO (38), δOCN (29)                                    |
| 178 (12)                     |                            | γOCNO (61), γOH (27)                                    |

<sup>a</sup> The MP2/6-311++G(2d,2p) calculated harmonic frequencies (in cm<sup>-1</sup>) and intensities (in km mol<sup>-1</sup>) are given. <sup>b</sup> For the observed bands the relative integrated intensities are given in parentheses. <sup>c</sup> All values less than 10% have been omitted. Definition of internal coordinates is given in Table S2 (ESI†).
